# Supplementary material for: Trinuclear heterometallic CuII–MnIIcomplexes of a salen type Schiff base ligand: anion dependent variation of phenoxido bridging angles and magnetic coupling
Source: Royal Society of Chemistry journal article supplement (doi:10.1039/c3dt52012a), 2013-10-08
Supplement: c3dt52012a.pdf [file c3dt52012a.pdf]

## Supporting Information

### **Trinuclear heterometallic Cu<sup>II</sup>–Mn<sup>II</sup> complexes of a salen type Schiff base ligand: anion dependent variation of phenoxido bridging angles and magnetic coupling**

Piya Seth, Soumavo Ghosh, Albert Figuerola and Asutosh Ghosh

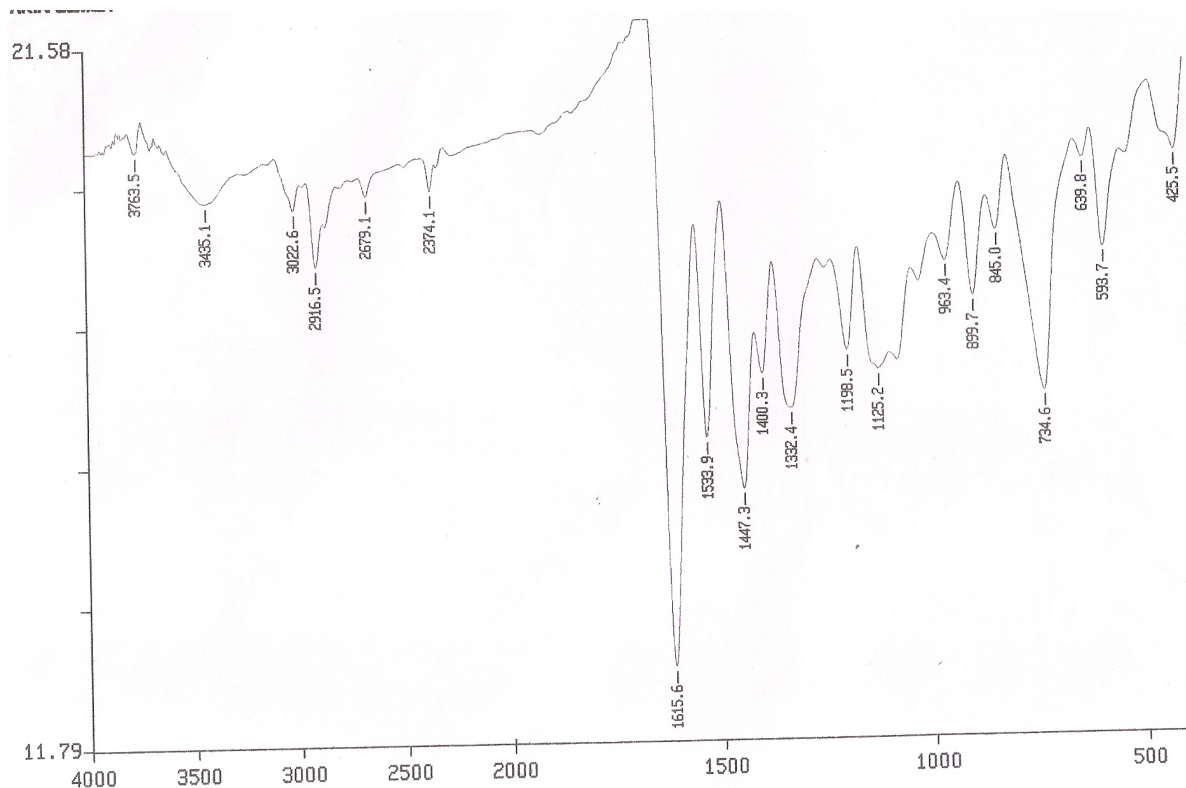

**Figure S1:** IR spectra of the metalloligand [CuL].

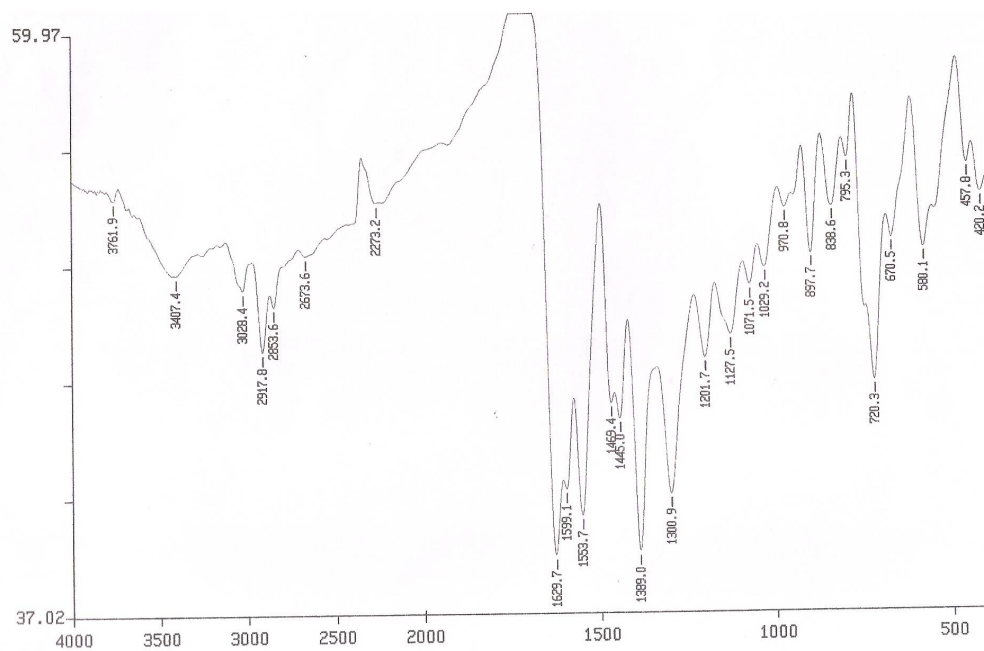

Figure S2: IR spectra of complex 1.

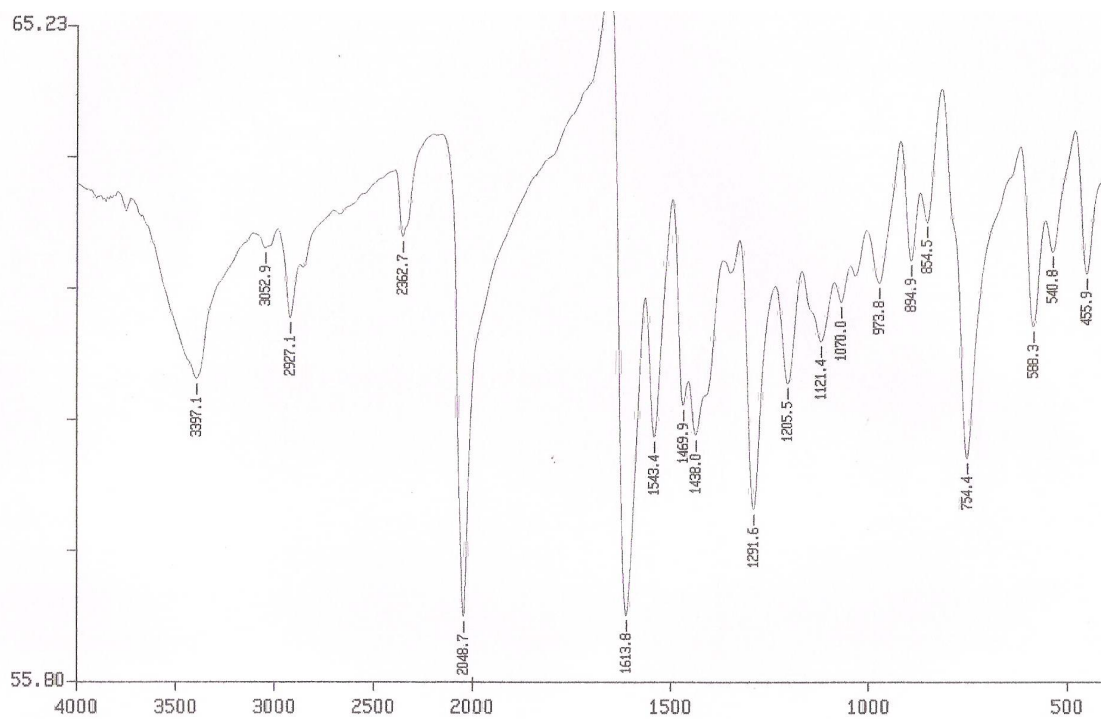

Figure S3: IR spectra of complex 2.

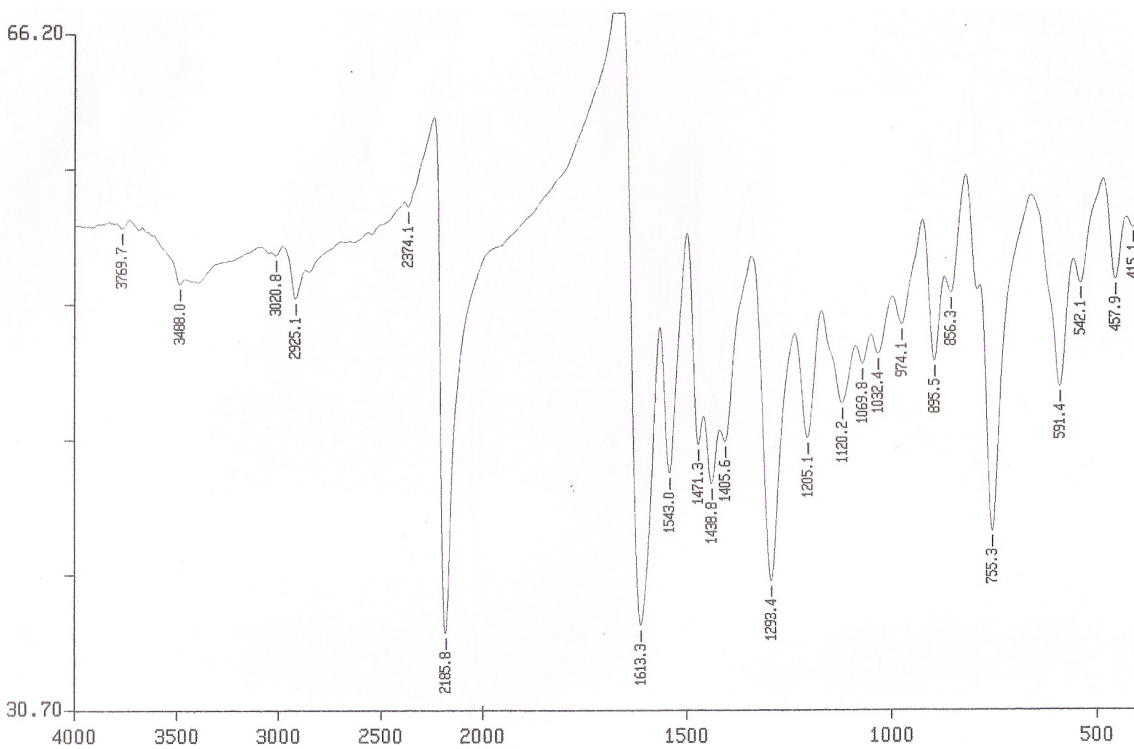

Figure S4: IR spectra of complex 3.

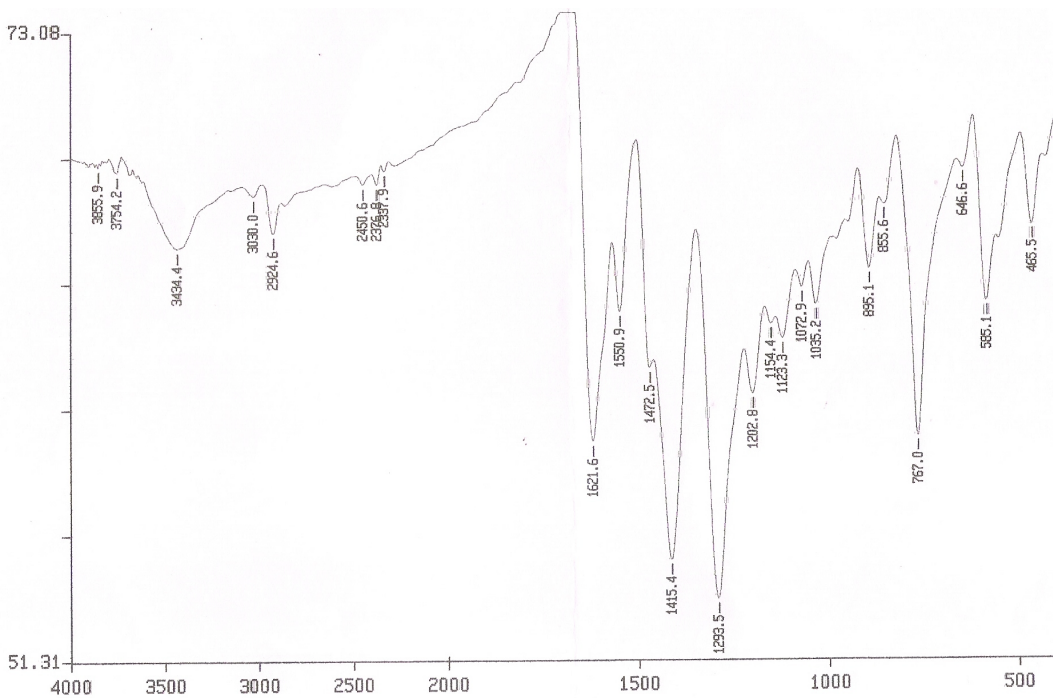

Figure S5: IR spectra of complex 4.

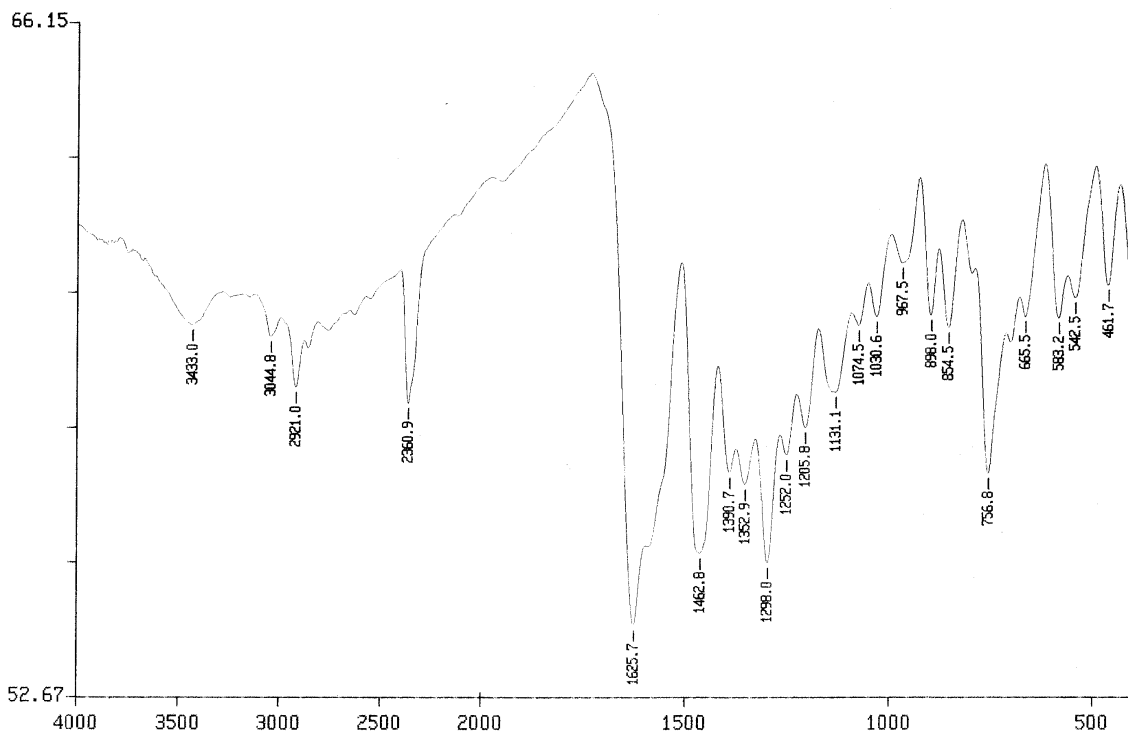

**Figure S6:** IR spectra of complex **5**.

#### Hydrogen bonding in Complexes **2-5**:

In Complex **2** the hydrogen atom H(8) from salicylaldehyde moiety forms a donor intermolecular hydrogen bond with azido nitrogen N(3) (1-x,-y,1-z) with dimensions C(11)⋯N(3) 3.43(3) Å, C(11)–H(8)⋯N(3) 163.1(2)° and H(8)⋯N(3) 2.47 Å to result in a 1D chain along the crystallographic *a* axis. (Fig. S7)

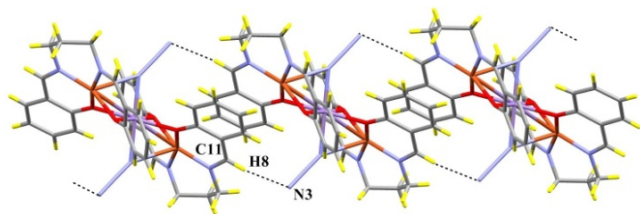

**Figure S7:** Hydrogen bonding in complex **2**.

Each of the isocyanato oxygen of complex **3** (O5, O6) participates in intermolecular hydrogen bonding with the hydrogen atoms (H7, H36, H15B) of ligand moiety with dimensions in the

range  $C\cdots O$  3.333(8)–3.393(6) Å,  $C-H\cdots O$  142.0(3)–155.0(3)° and  $H\cdots O$  2.52–2.55 Å. (Fig. S8)

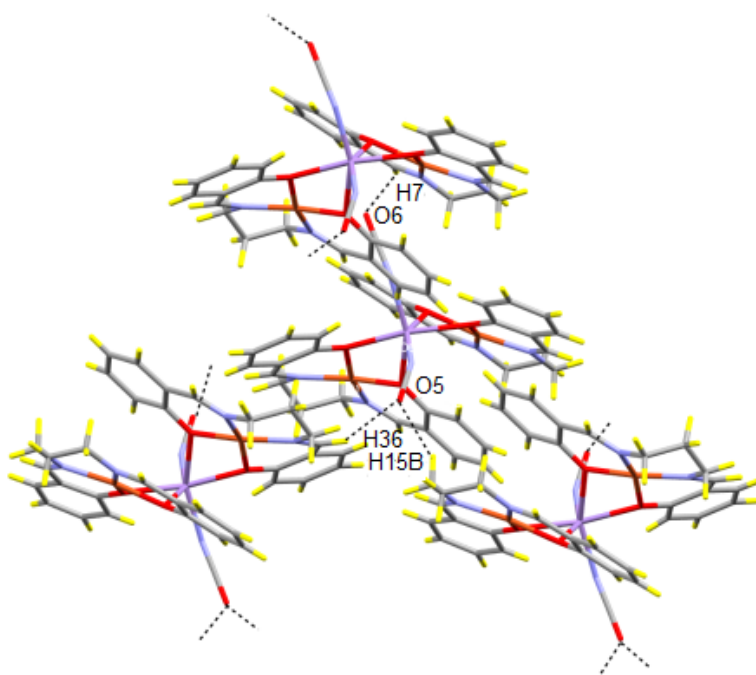

**Figure S8.** Hydrogen bonded polymeric structure in **3**.

In complex **4** the nitrate oxygen (O5) forms intermolecular hydrogen bonding with hydrogen atom (H10) of the ligand moiety with dimensions  $C(14)\cdots O(5)$  3.462(7) Å,  $C(14)-H(10)\cdots O(5)$  170(4)° and  $H(10)\cdots O(5)$  2.54 Å. (Fig. S9) In **5** phenolic oxygen (O5) of salicylate forms intermolecular hydrogen bonding with methylene hydrogen (H1B2) of dichloromethane solvent with dimensions  $C(1B)\cdots O(5)$  3.45(3) Å,  $C(1B)-H(1B2)\cdots O(5)$  148° and  $H(1B2)\cdots O(5)$  2.58 Å. (Fig. S10)

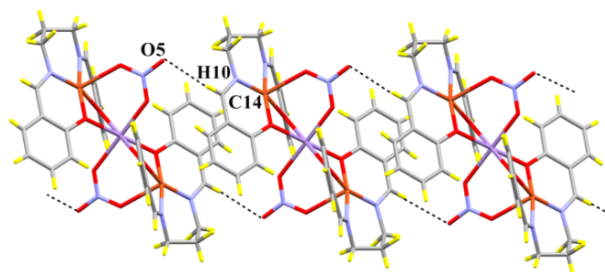

**Figure S9.** Hydrogen bonded 1D chain in **4**.

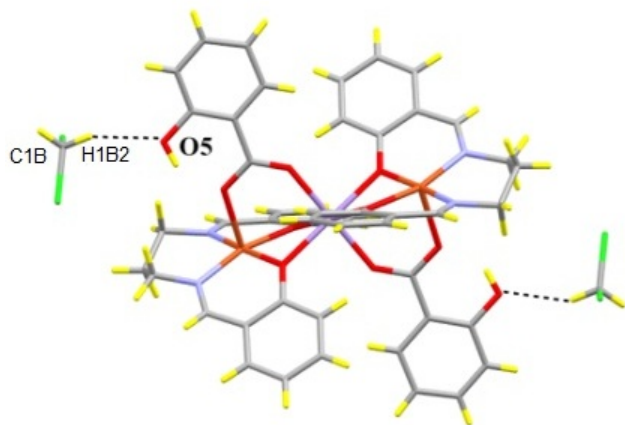

**Figure S10.** Hydrogen bonding with solvent molecule ( $\text{CH}_2\text{Cl}_2$ ) in **5**.

**ST 1** Bond distances ( $\text{\AA}$ ) and angles ( $^\circ$ ) in the metal coordination spheres of complex **1**.

| Atoms           | Distance ( $\text{\AA}$ ) | Atoms           | Distance ( $\text{\AA}$ ) |
|-----------------|---------------------------|-----------------|---------------------------|
| Cu(1)–O(1)      | 1.970(2)                  | Cu(2)–N(3)      | 1.981(4)                  |
| Cu(1)–O(2)      | 1.961(2)                  | Cu(2)–N(4)      | 1.997(3)                  |
| Cu(1)–O(5)      | 2.171(3)                  | Mn(3)–O(1)      | 2.198(2)                  |
| Cu(1)–N(1)      | 1.995(3)                  | Mn(3)–O(2)      | 2.176(2)                  |
| Cu(1)–N(2)      | 1.985(3)                  | Mn(3)–O(3)      | 2.172(2)                  |
| Cu(2)–O(3)      | 1.964(2)                  | Mn(3)–O(4)      | 2.214(2)                  |
| Cu(2)–O(4)      | 1.956(2)                  | Mn(3)–O(6)      | 2.159(2)                  |
| Cu(2)–O(8)      | 2.195(3)                  | Mn(3)–O(7)      | 2.172(2)                  |
| Atoms           | Angle ( $^\circ$ )        | Atoms           | Angle ( $^\circ$ )        |
| O(1)–Cu(1)–O(2) | 81.85(9)                  | O(8)–Cu(2)–N(4) | 92.76(1)                  |
| O(1)–Cu(1)–O(5) | 95.75(9)                  | N(3)–Cu(2)–N(4) | 95.52(1)                  |
| O(1)–Cu(1)–N(1) | 90.19(1)                  | O(1)–Mn(3)–O(2) | 72.13(8)                  |
| O(1)–Cu(1)–N(2) | 167.27(1)                 | O(1)–Mn(3)–O(3) | 108.12(8)                 |
| O(2)–Cu(1)–O(5) | 96.69(9)                  | O(1)–Mn(3)–O(4) | 176.70(8)                 |
| O(2)–Cu(1)–N(1) | 166.94(1)                 | O(1)–Mn(3)–O(6) | 89.04(9)                  |
| O(2)–Cu(1)–N(2) | 91.27(1)                  | O(1)–Mn(3)–O(7) | 91.41(9)                  |
| O(5)–Cu(1)–N(1) | 94.39(1)                  | O(2)–Mn(3)–O(3) | 178.78(9)                 |
| O(5)–Cu(1)–N(2) | 95.68(1)                  | O(2)–Mn(3)–O(4) | 108.17(8)                 |

|                 |           |                  |           |
|-----------------|-----------|------------------|-----------|
| N(1)–Cu(1)–N(2) | 94.50(1)  | O(2)–Mn(3)–O(6)  | 87.10(8)  |
| O(3)–Cu(2)–O(4) | 81.85(9)  | O(2)–Mn(3)–O(7)  | 93.20(8)  |
| O(3)–Cu(2)–O(8) | 96.24(1)  | O(3)–Mn(3)–O(4)  | 71.65(8)  |
| O(3)–Cu(2)–N(3) | 90.34(1)  | O(3)–Mn(3)–O(6)  | 94.10(8)  |
| O(3)–Cu(2)–N(4) | 168.73(1) | O(3)–Mn(3)–O(7)  | 85.60(8)  |
| O(4)–Cu(2)–O(8) | 94.70(9)  | O(4)–Mn(3)–O(6)  | 87.70(8)  |
| O(4)–Cu(2)–N(3) | 167.62(1) | O(4)–Mn(3)–O(7)  | 91.86(8)  |
| O(4)–Cu(2)–N(4) | 90.68(1)  | O(6)–Mn(3)–O(7)  | 179.52(9) |
| O(8)–Cu(2)–N(3) | 95.69(12) | Cu(1)–O(1)–Mn(3) | 97.71(9)  |

**ST 2** Bond distances (Å) and angles (°) in the metal coordination spheres of complex **2**.

| Atoms                         | Distance (Å) | Atoms                                      | Distance (Å) |
|-------------------------------|--------------|--------------------------------------------|--------------|
| Cu(1)–O(1)                    | 1.9474(2)    | Mn(3)–O(1)                                 | 2.2003(2)    |
| Cu(1)–O(2)                    | 1.9346(2)    | Mn(3)–O(2)                                 | 2.1718(2)    |
| Cu(1)–N(4)                    | 1.9434(2)    | Mn(3)–N(1)                                 | 2.194(2)     |
| Cu(1)–N(5)                    | 1.9726(2)    | Mn(3)–O(1) <sup>a</sup>                    | 2.2003(2)    |
| Cu(1)–N(1) <sup>a</sup>       | 2.649(2)     | Mn(3)–O(2) <sup>a</sup>                    | 2.1718(2)    |
|                               |              | Mn(3)–N(1) <sup>a</sup>                    | 2.194(2)     |
| Atoms                         | Angle (°)    | Atoms                                      | Angle (°)    |
| O(1)–Cu(1)–O(2)               | 81.92(5)     | O(1)–Mn(3)–O(2) <sup>a</sup>               | 108.81(4)    |
| O(1)–Cu(1)–N(4)               | 92.28(5)     | O(1)–Mn(3)–N(1) <sup>a</sup>               | 83.37(5)     |
| O(1)–Cu(1)–N(5)               | 160.12(5)    | O(2)–Mn(3)–N(1)                            | 98.52(5)     |
| O(1)–Cu(1)–N(1) <sup>a</sup>  | 77.29(5)     | O(1) <sup>a</sup> –Mn(3)–O(2)              | 108.81(4)    |
| O(2)–Cu(1)–N(4)               | 165.64(5)    | O(2)–Mn(3)–O(2) <sup>a</sup>               | 180.00       |
| O(2)–Cu(1)–N(5)               | 91.47(5)     | O(2)–Mn(3)–N(1) <sup>a</sup>               | 81.48(5)     |
| O(2)–Cu(1)–N(1) <sup>a</sup>  | 75.06(5)     | O(1) <sup>a</sup> –Mn(3)–N(1)              | 83.37(5)     |
| N(4)–Cu(1)–N(5)               | 98.09(6)     | O(2) <sup>a</sup> –Mn(3)–N(1)              | 81.48(5)     |
| N(1) <sup>a</sup> –Cu(1)–N(4) | 90.89(6)     | N(1)–Mn(3)–N(1) <sup>a</sup>               | 180.00       |
| N(1) <sup>a</sup> –Cu(1)–N(5) | 119.23(6)    | O(1) <sup>a</sup> –Mn(3)–O(2) <sup>a</sup> | 71.19(4)     |



|                              |          |                                            |          |
|------------------------------|----------|--------------------------------------------|----------|
| O(1)–Mn(3)–O(2)              | 71.19(4) | O(1) <sup>a</sup> –Mn(3)–N(1) <sup>a</sup> | 96.63(5) |
| O(1)–Mn(3)–N(1)              | 96.63(5) | O(2) <sup>a</sup> –Mn(3)–N(1) <sup>a</sup> | 98.52(5) |
| O(1)–Mn(3)–O(1) <sup>a</sup> | 180.00   | Cu(1)–O(1)–Mn(3)                           | 91.38(4) |
|                              |          | Cu(1)–O(2)–Mn(3)                           | 92.60(4) |

<sup>a</sup>= -x,-y,1-z

**ST 3** Bond distances (Å) and angles (°) in the metal coordination spheres of complex **3**.

| Atoms           | Distance (Å) | Atoms           | Distance (Å) |
|-----------------|--------------|-----------------|--------------|
| Cu(1)–O(3)      | 1.937(3)     | Cu(2)–N(2)      | 1.956(4)     |
| Cu(1)–O(4)      | 1.922(3)     | Mn(1)–O(1)      | 2.268(3)     |
| Cu(1)–N(3)      | 1.957(4)     | Mn(1)–O(2)      | 2.274(3)     |
| Cu(1)–N(4)      | 1.982(4)     | Mn(1)–O(3)      | 2.345(3)     |
| Cu(2)–O(1)      | 1.924(3)     | Mn(1)–O(4)      | 2.228(3)     |
| Cu(2)–O(2)      | 1.916(3)     | Mn(1)–N(5)      | 2.093(4)     |
| Cu(2)–N(1)      | 1.960(4)     | Mn(1)–N(6)      | 2.107(4)     |
|                 |              |                 |              |
| Atoms           | Angle (°)    | Atoms           | Angle (°)    |
| O(3)–Cu(1)–O(4) | 78.58(1)     | O(1)–Mn(1)–O(2) | 66.67(1)     |
| O(3)–Cu(1)–N(3) | 92.54(2)     | O(1)–Mn(1)–O(3) | 100.35(1)    |
| O(3)–Cu(1)–N(4) | 169.25(1)    | O(1)–Mn(1)–O(4) | 160.55(1)    |
| O(4)–Cu(1)–N(3) | 169.20(2)    | O(1)–Mn(1)–N(5) | 97.20(1)     |
| O(4)–Cu(1)–N(4) | 92.07(1)     | O(1)–Mn(1)–N(6) | 92.05(1)     |
| N(3)–Cu(1)–N(4) | 97.29(2)     | O(2)–Mn(1)–O(3) | 75.42(1)     |
| O(1)–Cu(2)–O(2) | 81.07(1)     | O(2)–Mn(1)–O(4) | 96.49(1)     |
| O(1)–Cu(2)–N(1) | 91.56(1)     | O(2)–Mn(1)–N(5) | 94.19(2)     |
| O(1)–Cu(2)–N(2) | 167.13(1)    | O(2)–Mn(1)–N(6) | 153.80(1)    |
| O(2)–Cu(2)–N(1) | 166.64(2)    | O(3)–Mn(1)–O(4) | 64.56(1)     |
| O(2)–Cu(2)–N(2) | 91.50(2)     | O(3)–Mn(1)–N(5) | 153.85(1)    |
| N(1)–Cu(2)–N(2) | 96.78(2)     | O(3)–Mn(1)–N(6) | 94.74(1)     |



|  |  |                  |           |
|--|--|------------------|-----------|
|  |  | O(4)–Mn(1)–N(5)  | 93.57(1)  |
|  |  | O(4)–Mn(1)–N(6)  | 101.06(1) |
|  |  | N(5)–Mn(1)–N(6)  | 103.89(2) |
|  |  | Cu(2)–O(1)–Mn(1) | 101.81(1) |
|  |  | Cu(2)–O(2)–Mn(1) | 101.89(1) |
|  |  | Cu(1)–O(3)–Mn(1) | 98.64(1)  |
|  |  | Cu(1)–O(4)–Mn(1) | 103.22(1) |

**ST 4** Bond distances (Å) and angles (°) in the metal coordination spheres of complexes **4** and **5**.

|                 | <b>4</b>  | <b>5</b>  |
|-----------------|-----------|-----------|
| Cu(1)–O(1)      | 1.943(3)  | 1.963(3)  |
| Cu(1)–O(2)      | 1.948(3)  | 1.957(4)  |
| Cu(1)–O(3)      | 2.410(4)  | 2.248(5)  |
| Cu(1)–N(1)      | 1.955(5)  | 1.995(5)  |
| Cu(1)–N(2)      | 1.964(4)  | 1.973(5)  |
| Mn(1)–O(1)      | 2.140(3)  | 2.159(4)  |
| Mn(1)–O(2)      | 2.137(3)  | 2.194(3)  |
| Mn(1)–O(4)      | 2.239(4)  | 2.151(4)  |
|                 |           |           |
| O(1)–Cu(1)–O(2) | 82.49(1)  | 81.99(2)  |
| O(1)–Cu(1)–O(3) | 93.16(1)  | 98.37(2)  |
| O(1)–Cu(1)–N(1) | 90.72(2)  | 90.22(2)  |
| O(1)–Cu(1)–N(2) | 162.71(1) | 165.90(2) |
| O(2)–Cu(1)–O(3) | 91.10(1)  | 92.57(2)  |
| O(2)–Cu(1)–N(1) | 170.42(1) | 171.31(2) |
| O(2)–Cu(1)–N(2) | 91.26(1)  | 90.51(2)  |

|                              |           |           |
|------------------------------|-----------|-----------|
| O(3)–Cu(1)–N(1)              | 82.50(1)  | 92.38(2)  |
| O(3)–Cu(1)–N(2)              | 103.09(1) | 93.89(2)  |
| N(1)–Cu(1)–N(2)              | 97.16(2)  | 96.30(2)  |
| O(1)–Mn(1)–O(2)              | 73.72(1)  | 72.42(1)  |
| O(1)–Mn(1)–O(4)              | 85.86(1)  | 89.01(2)  |
| O(1)–Mn(1)–O(1) <sup>a</sup> | 180.00    | 180.00    |
| O(1)–Mn(1)–O(2) <sup>a</sup> | 106.28(1) | 107.58(1) |
| O(1)–Mn(1)–O(4) <sup>a</sup> | 94.14(1)  | 91.00(1)  |
| O(2)–Mn(1)–O(4)              | 88.68(13) | 90.06(2)  |
| O(2)–Mn(1)–O(2) <sup>a</sup> | 180.00    | 180.00    |
| O(2)–Mn(1)–O(4) <sup>a</sup> | 91.33(1)  | 89.94(2)  |
| O(4)–Mn(1)–O(4) <sup>a</sup> | 180.00    | 180.00    |
| Cu(1)–O(1)–Mn(1)             | 97.63(1)  | 98.20(1)  |
| Cu(1)–O(2)–Mn(1)             | 97.54(1)  | 97.25(1)  |

<sup>a</sup>= 1-x,-y,-z in **4** and -x,-y,-z in **5**
